# Supplementary material
Source: Elsevier journal article supplement (https://discovery.ucl.ac.uk/1433395/2/mmc1.pdf)

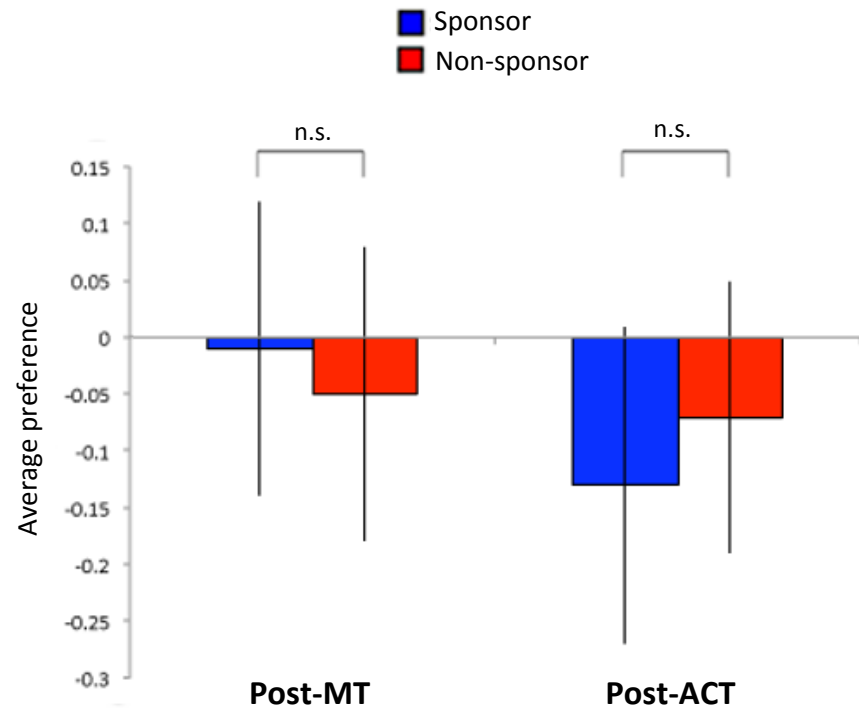

Supplement: mmc1 [file mmc1.pdf]
